# Supplementary material for: Protocol for the T-REX-trial: tailored regional external beam radiotherapy in clinically node-negative breast cancer patients with 1-2 sentinel node macrometastases – an open, multicentre, randomised non-inferiority phase 3 trial
Source: HighWire-hosted journal article supplement (doi:10.1136/bmjopen-2023-075543), 2023-09-01
Supplement: bmjopen-2023-075543supp001_data_supplement.pdf [file bmjopen-2023-075543supp001_data_supplement.pdf]

## **T-REX studien: Behövs strålbehandling mot närliggande lymfkörtlar för bröstcancerpatienter med en begränsad lymfkörtelspridning?**

(Tailored Regional External beam radiotherapy in clinically node-negative breast cancer patients with 1-2 sentinel node macrometastases)

### **Information till forskningspersoner**

Vi vill fråga dig om du vill delta i ett forskningsprojekt som kallas T-REX studien. I det här dokumentet får du information om projektet och om vad det innebär att delta.

Ditt deltagande är frivilligt och du kan när som helst välja att avbryta deltagandet. Om du väljer att inte delta eller vill avbryta ditt deltagande behöver du inte uppge varför, och det kommer inte heller att påverka din framtida vård eller behandling. Om du vill avbryta ditt deltagande ska du kontakta studieansvarig forskningssköterska vid din behandlande klinik.

### **Vad är det för ett projekt och varför vill ni att jag ska delta?**

Projektet undersöker om de volymer som strålbehandlas efter bröstcancerkirurgi kan minskas för patienter som har en begränsad spridning till lymfkörtlarna. Tidigare studier visar att mindre strålbehandling ger lägre risk för biverkningar som smärta, svullnad och försämrad funktion i arm/skuldra. Dessutom minskas stråldosen till lunga och ev. hjärta och den risk för lungcancer och hjärtsjukdom som strålbehandling kan medföra på längre sikt.

Vid bröstcancerkirurgi genomförs oftast en sentinel node-biopsi, vilket innebär att man opererar ut en eller ett fåtal ”portvakslymfkörtlar” för att se om bröstcanceren har spridit tumörceller till armhålan. Denna information styr val av efterbehandling (t.ex. strålbehandling, antihormonella läkemedel och cellgifter).

Om tumörceller hittas i sentinel node (portvakslymfkörteln) ges i Sverige idag strålbehandling mot kvarvarande lymfkörtlar i armhålan, kring nyckelbenet och i vissa fall vid bröstbenet. Äldre studier har visat en viss överlevnadsvinst av sådan behandling, men med dagens förbättrade läkemedelsbehandling är det tveksamt om denna strålning fortfarande behövs. Moderna studier där man jämfört en grupp av patienter som genomgått kirurgi/strålbehandling mot armhålan lymfkörtlar med en grupp där man avstått denna behandling har inte visat någon skillnad i återfallsrisk, trots mindre behandling i den ena gruppen.

I T-REX studien undersöks om strålbehandling mot lymfkörtlarna kan avstås vid bröstcancer med en begränsad körtelspridning. Därigenom kommer strålbehandlingens biverkningar kunna minskas eller helt undvikas. Projektet planerar att inkludera 1350 patienter och kommer pågå vid flera kliniker i Sverige samt i Norge och Finland.

Forskningshuvudman är Skånes Universitetssjukhus, Region Skåne. Med forskningshuvudman menas den organisation som är ansvarig för projektet. Ansökan är godkänd av Etikprövningsmyndigheten, diarienummer för prövningen hos Etikprövningsmyndigheten är 2022-02178-01 och 2022-05093-02.

## **T-REX studien: Behövs strålbehandling mot närliggande lymfkörtlar för bröstcancerpatienter med en begränsad lymfkörtelspridning?**

(Tailored Regional External beam radiotherapy in clinically node-negative breast cancer patients with 1-2 sentinel node macrometastases)

### **Hur går projektet till?**

Att du tillfrågas om projektet beror på att din bortopererade sentinel node innehåller cancerceller, samt din tumör har «snällare» egenskaper (uttryck av östrogenreceptorn, men ej en annan faktor viktig för tumörutveckling kallad HER2). Om du deltar kommer du lottas till att antingen få standardbehandling (strålbehandling mot lymfkörtlar i armhålan, kring nyckelbenet och ev. kring bröstbenet) alternativt ingen strålbehandling mot lymfkörtlarna. Om bröstet opererats bort ges då ingen strålbehandling alls och efter bröstbevarande kirurgi ges strålbehandling enbart mot kvarvarande bröst.

Deltagande i projektet kommer inte påverka din läkemedelsbehandling, tid till start av strålbehandling eller den strålningsteknik som används. Uppföljning sker på din onkologiska eller kirurgiska klinik enligt deras vanliga rutiner.

Att avstå lymfkörtelbestrålning kan leda till minskade armproblem, minskad risk för biverkningar från hjärta och lunga och ökad livskvalitet. Inom projektet vill vi därför veta vilka besvär du upplever både inför och efter din behandling. Enkäter med frågor kring funktion i arm/hand/skuldra, välmående och livskvalitet kommer därför lämnas till dig vid studiestart samt 1, 3 och 5 år efter operationen. Dessa tar ca 10-15 minuter att fylla i. Deltagande är frivilligt, och du kan välja att avstå från enkäterna och ändå delta i huvudprojektet.

För de deltagare som ger sitt godkännande för analys av tumörvävnad kommer tumörens genuttryck att undersökas, för att se om denna analys bättre än dagens metoder kan förutsäga nyttan av strålbehandling. Detta kan i så fall användas för att förbättra och individanpassa strålbehandlingen för framtida patienter. Analysen görs hos ett företag i USA (Exact Sciences), till vilket vävnadsmaterial från den tumör som opererats bort skickas. Detta företag har expertkunskaper på undersökning av tumörers genuttryck och har deltagit i flera liknande internationella studier tidigare.

### **Möjliga följder och risker med att delta i projektet**

Om du lottas till studiegruppen kommer du få mindre strålbehandling än dagens standard. Du får därmed också en mindre risk för biverkningar av strålbehandlingen.

Äldre studier har visat en skyddande effekt av strålning mot återfall i kvarvarande bröst/bröstkorgsvägg och lymfkörtlar, vilket hade kunnat innebära att mindre strålbehandling ökar återfallsrisken något. Idag används dock bättre och nyare bröstcancerläkemedel, vilket kraftigt har minskat risken för återfall. Nyare studier visar heller inte på någon riskökning med mindre kirurgi/strålning, vilket talar för att strålbehandlingen idag kan minskas för vissa tumörtyper och det är detta vi undersöker inom T-REX studien.

## **T-REX studien: Behövs strålbehandling mot närliggande lymfkörtlar för bröstcancerpatienter med en begränsad lymfkörtelspridning?**

(Tailored Regional External beam radiotherapy in clinically node-negative breast cancer patients with 1-2 sentinel node macrometastases)

Efter behandling kommer du följas vid din onkologiska eller kirurgiska klinik. Skulle det uppstå ett återfall i armhålan eller i bröstet/bröstkorgsväggen hanteras det enligt klinisk rutin, vilket kan innebära kirurgi och medicinsk behandling.

### **Vad händer med mina uppgifter?**

Projektet kommer att samla in och registrera information om dig. Denna hanteras så att obehöriga inte kan ta del av den.

Ingår du i projektet registreras din information i en databas som hanteras och monitoreras av Kliniska Studier Sverige, Forum Söder, Region Skåne. Uppgifter om din tumör, behandling, resultat från operation, diagnostik och återbesök pseudonymiseras, dvs du som deltagare får ett «studie-ID» så att ditt personnummer eller ditt namn inte finns i databasen. Nyckeln som kopplar ditt personnummer och ditt namn till studie-ID finns på det sjukhus där du inkluderats i projektet, samt hos studieansvariga inom Region Skåne. För att garantera hög kvalitet på studiegenomförande kommer oberoende granskare (monitorer) ta del av din information och kontrollera uppgifter i din journal. Tillgång till dina journaluppgifter kommer behövas tills projektet är avslutat, vilket är 25 år efter sista studiepatienten inkluderats. All hantering av information sker i enlighet med EU:s dataskyddsförordning (General Data Protection Regulation, GDPR). Information kommer även inhämtas från nationella register, t ex det nationella kvalitetsregistret för bröstcancer, försäkringskassans register om sjukskrivning, socialstyrelsens patientregister som registrerar vårdkonsumtion och register avseende cancersjukdom och överlevnad.

För att säkerställa att din strålbehandling givits i enlighet med studieprotokollet, och att uppgifter om den har registrerats och lagrats korrekt, lämnas personuppgifter ut från ditt behandlande sjukhus till studieansvariga inom Region Skåne. Oberoende experter tar sedan del av röntgenbilder som visar strålbehandlingsplanen samt tillhörande behandlingssammanfattning. Även dessa experter är ålagda ansvar om sekretess.

Ansvarig för dina personuppgifter är Region Skåne och den region i vilken du behandlas. Enligt EU:s dataskyddsförordning har du rätt att kostnadsfritt få ta del av de uppgifter om dig som hanteras i projektet, och vid behov få eventuella fel rättade. Du kan också begära att uppgifter om dig raderas samt att behandlingen av dina personuppgifter begränsas. Rätten till radering och till begränsning av behandling av personuppgifter gäller dock inte när uppgifterna är nödvändiga för den aktuella forskningen. Om du vill ta del av uppgifterna ska du kontakta din lokala forskningssköterska. Dataskyddsombud nås på [region@skane.se](mailto:region@skane.se) eller 044-3093000, eller för det lokala dataskyddsombudet på \_\_\_\_\_.

Om du är missnöjd med hur dina personuppgifter behandlas har du rätt att ge in klagomål till Integritetsskyddsmyndigheten, som är tillsynsmyndighet.

## **T-REX studien: Behövs strålbehandling mot närliggande lymfkörtlar för bröstcancerpatienter med en begränsad lymfkörtelspridning?**

(Tailored Regional External beam radiotherapy in clinically node-negative breast cancer patients with 1-2 sentinel node macrometastases)

### **Vad händer med mina prover?**

För de deltagare som godkänner analys av vävnadsprover skickas en vävnadsbit från den tumör som tagits bort under operationen till Västra Götalandsregionen, Biobank Väst, IVO-nummer 890. En provsamlings kallad T-REX kommer sättas upp vid verksamheten för Onkologi, Sahlgrenska Universitetssjukhuset, Västra Götalandsregionen. I provsamlings kommer en bit av vävnaden förvaras för analyser avseende tumörens biologi i förhållande till återfallsrisk och behandlingseffekt. En mindre mängd av vävnaden kommer även skickas för analys från Biobank Väst till ett företag i USA (Exact Sciences). Resten av vävnadsbiten skickas tillbaka till din hemmaklinik. Samtliga ovan nämnda prov kommer att vara kodade (pseudonymiserade) som beskrivet ovan. Vävnad kan också komma att samlas in från eventuella bröstcanceråterfall.

Du har rätt att utan förklaring säga nej till att proverna sparas. Om du samtycker till att proverna sparas har du rätt att senare och utan förklaring ångra det samtycket. Dina prover kommer i så fall att kastas eller avidentifieras. Om du vill ångra ett samtycke ska du kontakta din lokala forskningssköterska.

Analys av dina vävnadsprover syftar till att förbättra och individualisera strålbehandlingen efter tumörens biologi för framtida patienter. Proverna hanteras enligt Svensk Biobankslag (2002:297) och får endast användas på det sätt du samtyckt till. Vill du inte att dina prover ska vara tillgängliga för analyser inom projektet skriver du ej under avsnittet avseende samtycke för analys av tumörvävnad (sista sidan i patientinformationen).

### **Hur får jag information om resultatet av projektet?**

Resultaten från projektet kommer publiceras i vetenskapliga tidskrifter och vid vetenskapliga kongresser. Detta sker på gruppnivå utan att resultaten kan kopplas till dig som individ.

### **Försäkring och ersättning**

Inom projektet gäller patientförsäkringen som annars inom vården. Man får ingen ekonomisk ersättning för deltagande.

## **T-REX studien: Behövs strålbehandling mot närliggande lymfkörtlar för bröstcancerpatienter med en begränsad lymfkörtelspridning?**

(Tailored Regional External beam radiotherapy in clinically node-negative breast cancer patients with 1-2 sentinel node macrometastases)

### **Ansvariga för projektet**

Docent, specialitäläkare Sara Alkner, Verksamhetsområde onkologi, hematologi och strålningsfysik, Skånes Universitetssjukhus samt Avdelningen för onkologi, Lunds Universitet.

E-mail: cto.hematologi\_onkologi.se@skane.se. Tel: 046-171000, 046-177617

Docent, överläkare Jana de Boniface, Bröstenheten, Capio St Göran's sjukhus samt Avdelningen för molekylär medicin och kirurgi, Karolinska Institutet, Stockholm.

Professor, överläkare Per Karlsson, Onkologiska kliniken, Sahlgrenska Universitetssjukhus samt Avdelningen för onkologi, Göteborgs Universitet, Göteborg.

Överläkare, PhD Dan Lundstedt, Onkologiska kliniken, Sahlgrenska Universitetssjukhus samt Avdelningen för onkologi, Göteborgs Universitet, Göteborg.

Professor, överläkare Lisa Rydén, Kirurgiska Kliniken, Skånes Universitetssjukhus samt Avdelningen för onkologi, Lunds Universitet.

### **Lokalt ansvariga kontaktpersoner**

Ansvarig forskare: \_\_\_\_\_

Ansvarig forskningssköterska: \_\_\_\_\_

## T-REX studien: Behövs strålbehandling mot närliggande lymfkörtlar för bröstcancerpatienter med en begränsad lymfkörtelspridning?

(Tailored Regional External beam radiotherapy in clinically node-negative breast cancer patients with 1-2 sentinel node macrometastases)

### Samtycke till att delta i projektet

Jag har fått muntlig och/eller skriftlig information om T-REX studien och har haft möjlighet att ställa frågor. Jag får behålla den skriftliga informationen.

Jag vet att mitt deltagande i projektet är frivilligt samt att jag när som helst och utan förklaring kan avbryta mitt deltagande. Jag samtycker till att oberoende granskare får ta del till mina journaluppgifter för att verifiera data och säkerställa kvalitet samt att extern oberoende granskning av strålbehandlingens kvalitet får ske på beskrivet sätt, och till att mina personuppgifter får behandlas enligt den information jag har fått

- Jag samtycker till att delta i projektet «Minskad strålbehandling mot närliggande lymfkörtlar till bröstcancerpatienter med låg återfallsrisk: T-REX studien.»

.....  
Patientens underskrift

.....  
Personnummer

.....  
Namnförtydligande

.....  
Datum

### Samtycke till analys av tumörvävnad

Jag har fått information om att de prover jag lämnar kommer användas för analyser av tumörbiologi i förhållande till återfallsrisk och nytta av återfallsförebyggande behandling. Jag har även fått information om att de prover jag lämnar kan bli aktuella för framtida forskning som inte är beskriven i informationen till mig som forskningsperson. I det fall mina prover ska användas i framtida forskning kommer Etikprövningsmyndigheten göra en prövning av det nya projektet och i sin prövning avgöra om jag ska tillfrågas på nytt.

- Jag samtycker till att vävnad från operationen och eventuella bröstcanceråterfall sänds till Biobank Väst sparas i en för studien avsedd provsamling och analyseras enligt beskrivningen i patientinformationen.
- Jag samtycker till att mina prover får sparas för framtida forskning.

.....  
Patientens underskrift

.....  
Datum

Jag har förklarat projektets upplägg och syfte för ovanstående patient och har noggrant informerat om målsättning och eventuella risker med projektet, samt verifierar att patienten läst och erhållit informationsbladet.

.....  
Läkarens underskrift

.....  
Datum

.....  
Namnförtydligande
